# Supplementary material
Source: PubMed Central journal article supplement (PMC8944279)
Supplement: NIHMS1789404-supplement-Supplementary_Materials.pdf [file NIHMS1789404-supplement-Supplementary_Materials.pdf]

## **Supplementary Materials**

### **Characterization of recessive Parkinson's disease in a large multicenter study**

Suzanne Lesage, Ariane Lunati, Marion Houot, Sawssan Ben Romdhan, Fabienne Clot, Christelle Tesson, Graziella Mangone, Benjamin Le Toullec, Thomas Courtin, Kathy Larcher, Mustapha Benmahdjoub, Mohammed Arezki, Ahmed Bouhouche, Mathieu Anheim, Emmanuel Roze, François Viallet, François Tison, Emmanuel Broussolle, Murat Emre, Hasmet Hanagasi, Basar Bilgic, Mouna Ben Djebara, Riadh Gouider, Meriem Tazir, Christine Tranchant, Marie Vidailhet, Eric Le Guern, Olga Corti, Chokri Mhiri, Ebba Lohmann, Andy Singleton, Jean-Christophe Corvol, Alexis Brice, for the French Parkinson disease genetics study group (PDG).

Supplementary TABLE 1. Generalised linear models (GLM) results for the 15 variables of interest

|                         | Intercept            |                           |         | Sex<br>(reference: F) |                           |          | Mutation status<br>(reference: PD-NM) |                           |          |
|-------------------------|----------------------|---------------------------|---------|-----------------------|---------------------------|----------|---------------------------------------|---------------------------|----------|
|                         | Coefficient<br>± SEM | Cohen's<br>f <sup>2</sup> | p-value | Coefficient<br>± SEM  | Cohen's<br>f <sup>2</sup> | p-value  | Coefficient<br>± SEM                  | Cohen's<br>f <sup>2</sup> | p-value  |
| Dystonia at onset       | -0.35 ± 0.33         | <0.001                    | 0.7041  | -0.79 ± 0.66          | 0.001                     | 0.4248   | -0.79 ± 0.66                          | 0.001                     | 0.4248   |
| Akinesia at onset       | 0.95 ± 0.27          | 0.001                     | 0.2950  | -1.30 ± 0.52          | 0.015                     | 0.0001*  | -1.30 ± 0.52                          | 0.015                     | 0.0001*  |
| Tremor at onset         | -0.03 ± 0.26         | <0.001                    | 0.5964  | 1.04 ± 0.54           | 0.007                     | 0.0030*  | 1.04 ± 0.54                           | 0.007                     | 0.0030*  |
| Micrographia at onset   | -1.16 ± 0.28         | <0.001                    | 0.6055  | -0.41 ± 0.62          | 0.007                     | 0.0047*  | -0.41 ± 0.62                          | 0.007                     | 0.0047*  |
| Bradykinesia            | 2.36 ± 0.85          | 0.002                     | 0.4026  | 0.19 ± 1.62           | 0.002                     | 0.4335   | 0.19 ± 1.62                           | 0.002                     | 0.4335   |
| Rigidity                | 2.36 ± 0.62          | 0.002                     | 0.2645  | 0.24 ± 1.41           | <0.001                    | 0.7738   | 0.24 ± 1.41                           | <0.001                    | 0.7738   |
| Tremor                  | 0.30 ± 0.36          | <0.001                    | 0.8066  | 1.45 ± 0.82           | 0.002                     | 0.0480*  | 1.45 ± 0.82                           | 0.002                     | 0.0480*  |
| Asymmetry               | 3.70 ± 0.87          | 0.001                     | 0.5544  | -2.23 ± 1.35          | 0.010                     | 0.0002*  | -2.23 ± 1.35                          | 0.010                     | 0.0002*  |
| Dyskinesia              | 0.05 ± 0.54          | 0.003                     | 0.1490  | -2.08 ± 0.88          | 0.020                     | 0.0001*  | -2.08 ± 0.88                          | 0.020                     | 0.0001*  |
| Motor fluctuations      | -0.03 ± 0.53         | <0.001                    | 0.8487  | -0.50 ± 0.86          | 0.041                     | <0.0001* | -0.50 ± 0.86                          | 0.041                     | <0.0001* |
| Dysautonomia            | -0.86 ± 0.52         | 0.002                     | 0.1352  | -1.90 ± 0.95          | 0.086                     | <0.0001* | -1.90 ± 0.95                          | 0.086                     | <0.0001* |
| Dementia                | -2.93 ± 0.70         | <0.001                    | 0.7969  | -1.31 ± 1.79          | 0.009                     | 0.0087*  | -1.31 ± 1.79                          | 0.009                     | 0.0087*  |
| Levodopa responsiveness | -0.53 ± 0.68         | 0.001                     | 0.5672  | 5.02 ± 1.98           | 0.007                     | 0.1135   | 5.02 ± 1.98                           | 0.007                     | 0.1135   |
| Hoehn&Yahr ON‡          | 1.84 ± 0.19          | 0.002                     | 0.2813  | -0.59 ± 0.40          | 0.003                     | 0.1297   | -0.59 ± 0.40                          | 0.003                     | 0.1297   |
| UPDRS-Part III ON‡      | 9.17 ± 2.53          | 0.005                     | 0.0308* | -3.88 ± 4.72          | 0.008                     | 0.0081*  | -3.88 ± 4.72                          | 0.008                     | 0.0081*  |

part: 1/5

|                            | Age at onset         |            |          | Disease duration (years) |                      |            |          |                       |
|----------------------------|----------------------|------------|----------|--------------------------|----------------------|------------|----------|-----------------------|
|                            | Coefficient<br>± SEM | Cohen's f2 | p-value  | p-value<br>adjusted ‡    | Coefficient<br>± SEM | Cohen's f2 | p-value  | p-value<br>adjusted ‡ |
| Dystonia at onset          | -0.03 ± 0.01         | 0.014      | 0.0001*  | 0.0005*                  |                      |            |          |                       |
| Akinesia at onset          | -0.01 ± 0.01         | 0.003      | 0.0731   | 0.1829                   |                      |            |          |                       |
| Tremor at onset            | 0.01 ± 0.01          | 0.001      | 0.2149   | 0.2930                   |                      |            |          |                       |
| Micrographia at<br>onset   | 0.01 ± 0.01          | 0.002      | 0.0935   | 0.2004                   |                      |            |          |                       |
| Bradykinesia               | 0.02 ± 0.02          | 0.003      | 0.2102   | 0.2930                   | -0.02 ± 0.04         | 0.002      | 0.1849   | 0.1849                |
| Rigidity                   | -0.01 ± 0.01         | <0.001     | 0.9310   | 0.9851                   | -0.02 ± 0.04         | 0.002      | 0.1623   | 0.1785                |
| Tremor                     | 0.01 ± 0.01          | 0.002      | 0.1850   | 0.2930                   | 0.02 ± 0.02          | 0.003      | 0.0301*  | 0.0413*               |
| Asymmetry                  | -0.01 ± 0.02         | 0.004      | 0.1122   | 0.2104                   | 0.20 ± 0.10          | -0.001     | 0.1012   | 0.1237                |
| Dyskinesia                 | -0.03 ± 0.01         | <0.001     | 0.9851   | 0.9851                   | -0.01 ± 0.03         | 0.119      | <0.0001* | <0.0001*              |
| Motor fluctuations         | -0.03 ± 0.01         | 0.004      | 0.0326*  | 0.1222                   | -0.08 ± 0.03         | 0.077      | <0.0001* | <0.0001*              |
| Dysautonomia               | -0.01 ± 0.01         | 0.006      | 0.0079*  | 0.0396*                  | -0.04 ± 0.04         | 0.034      | <0.0001* | <0.0001*              |
| Dementia                   | 0.00 ± 0.01          | 0.002      | 0.4413   | 0.5516                   | 0.03 ± 0.03          | 0.007      | 0.0265*  | 0.0413*               |
| Levodopa<br>responsiveness | 0.02 ± 0.02          | 0.003      | 0.5417   | 0.6250                   | 0.23 ± 0.11          | 0.070      | <0.0001* | <0.0001*              |
| Hoehn&Yahr ON‡             | -0.01 ± 0.00         | 0.005      | 0.0589   | 0.1767                   | -0.02 ± 0.01         | 0.102      | <0.0001* | <0.0001*              |
| UPDRS-Part III<br>ON‡      | 0.11 ± 0.06          | 0.026      | <0.0001* | <0.0001*                 | 0.12 ± 0.16          | 0.064      | <0.0001* | <0.0001*              |

|                            | L-DOPA group<br>(reference: no L-DOPA) |            |          | Mutation status : Sex<br>(references: PD-NM / F) |                      |            |         |                       |
|----------------------------|----------------------------------------|------------|----------|--------------------------------------------------|----------------------|------------|---------|-----------------------|
|                            | Coefficient<br>± SEM                   | Cohen's f2 | p-value  | p-value<br>adjusted ‡                            | Coefficient<br>± SEM | Cohen's f2 | p-value | p-value<br>adjusted ‡ |
| Dystonia at onset          |                                        |            |          |                                                  | 0.53 ± 0.41          | 0.001      | 0.1918  | 0.8154                |
| Akinesia at onset          |                                        |            |          |                                                  | 0.47 ± 0.31          | 0.002      | 0.1304  | 0.8154                |
| Tremor at onset            |                                        |            |          |                                                  | 0.16 ± 0.33          | <0.001     | 0.6382  | 0.8154                |
| Micrographia at onset      |                                        |            |          |                                                  | -0.12 ± 0.38         | <0.001     | 0.7481  | 0.8154                |
| Bradykinesia               | 0.92 ± 0.37                            | 0.008      | 0.0058*  | 0.0105*                                          | 0.71 ± 0.87          | <0.001     | 0.4076  | 0.8154                |
| Rigidity                   | 0.68 ± 0.30                            | 0.005      | 0.0342*  | 0.0538                                           | -0.28 ± 0.71         | <0.001     | 0.6898  | 0.8154                |
| Tremor                     | 0.14 ± 0.17                            | 0.001      | 0.3852   | 0.4905                                           | -0.03 ± 0.41         | <0.001     | 0.9417  | 0.9417                |
| Asymmetry                  | -0.79 ± 0.48                           | <0.001     | 0.4013   | 0.4905                                           | 0.38 ± 0.63          | <0.001     | 0.5411  | 0.8154                |
| Dyskinesia                 | 1.20 ± 0.27                            | 0.039      | <0.0001* | <0.0001*                                         | 0.12 ± 0.40          | <0.001     | 0.7588  | 0.8154                |
| Motor fluctuations         | 1.24 ± 0.28                            | 0.034      | <0.0001* | <0.0001*                                         | -0.32 ± 0.39         | 0.001      | 0.4112  | 0.8154                |
| Dysautonomia               | 1.29 ± 0.27                            | 0.036      | <0.0001* | 0.0001*                                          | -0.29 ± 0.45         | <0.001     | 0.5247  | 0.8154                |
| Dementia                   | 0.35 ± 0.36                            | <0.001     | 0.8724   | 0.8887                                           | -0.47 ± 0.95         | 0.001      | 0.6246  | 0.8154                |
| Levodopa<br>responsiveness | 0.81 ± 0.28                            | 0.005      | 0.0012*  | 0.0032*                                          | 0.35 ± 0.87          | <0.001     | 0.6819  | 0.8154                |
| Hoehn&Yahr ON‡             | 0.32 ± 0.10                            | 0.014      | 0.0019*  | 0.0042*                                          | 0.34 ± 0.18          | 0.005      | 0.0569  | 0.8154                |
| UPDRS-Part III ON‡         | 0.62 ± 1.27                            | <0.001     | 0.8887   | 0.8887                                           | 0.70 ± 2.30          | <0.001     | 0.7611  | 0.8154                |

|                            | Mutation status : Age at onset<br>(reference: PD-NM) |            |         |                       | Mutation status : disease duration (years)<br>(reference: PD-NM) |            |         |                       |
|----------------------------|------------------------------------------------------|------------|---------|-----------------------|------------------------------------------------------------------|------------|---------|-----------------------|
|                            | Coefficient<br>± SEM                                 | Cohen's f2 | p-value | p-value<br>adjusted ‡ | Coefficient<br>± SEM                                             | Cohen's f2 | p-value | p-value<br>adjusted ‡ |
| Dystonia at onset          | 0.01 ± 0.02                                          | <0.001     | 0.5717  | 0.7795                |                                                                  |            |         |                       |
| Aakinesia at onset         | 0.01 ± 0.01                                          | 0.001      | 0.4259  | 0.6713                |                                                                  |            |         |                       |
| Tremor at onset            | -0.02 ± 0.02                                         | 0.001      | 0.2198  | 0.6593                |                                                                  |            |         |                       |
| Micrographia at onset      | 0.00 ± 0.02                                          | <0.001     | 0.9108  | 0.9226                |                                                                  |            |         |                       |
| Bradykinesia               | -0.02 ± 0.04                                         | <0.001     | 0.6777  | 0.8471                | 0.02 ± 0.04                                                      | 0.001      | 0.6725  | 0.7398                |
| Rigidity                   | 0.00 ± 0.03                                          | <0.001     | 0.9226  | 0.9226                | 0.02 ± 0.04                                                      | <0.001     | 0.6159  | 0.7398                |
| Tremor                     | -0.04 ± 0.02                                         | 0.002      | 0.0296* | 0.2188                | 0.04 ± 0.03                                                      | 0.002      | 0.1376  | 0.3028                |
| Asymmetry                  | 0.03 ± 0.03                                          | 0.002      | 0.4475  | 0.6713                | -0.14 ± 0.05                                                     | 0.002      | 0.0078* | 0.0431*               |
| Dyskinesia                 | 0.02 ± 0.02                                          | 0.002      | 0.3109  | 0.6713                | 0.05 ± 0.03                                                      | 0.004      | 0.0930  | 0.2584                |
| Motor fluctuations         | -0.02 ± 0.02                                         | 0.001      | 0.4406  | 0.6713                | 0.03 ± 0.02                                                      | <0.001     | 0.2991  | 0.4700                |
| Dysautonomia               | 0.05 ± 0.02                                          | 0.008      | 0.0130* | 0.1943                | -0.03 ± 0.03                                                     | 0.003      | 0.1836  | 0.3367                |
| Dementia                   | 0.07 ± 0.04                                          | <0.001     | 0.1267  | 0.4752                | -0.01 ± 0.04                                                     | 0.001      | 0.7848  | 0.7848                |
| Levodopa<br>responsiveness | -0.10 ± 0.05                                         | -0.002     | 0.0438* | 0.2188                | -0.19 ± 0.06                                                     | 0.006      | 0.0042* | 0.0431*               |
| Hoehn&Yahr ON‡             | 0.01 ± 0.01                                          | 0.001      | 0.3470  | 0.6713                | 0.02 ± 0.01                                                      | 0.004      | 0.0940  | 0.2584                |
| UPDRS-Part III ON‡         | 0.03 ± 0.11                                          | <0.001     | 0.8124  | 0.9226                | 0.08 ± 0.14                                                      | <0.001     | 0.5489  | 0.7398                |

|                            | Age at onset : disease duration (years) |            |          | Mutation status : L-DOPA group<br>(references: no L-DOPA / PD-NM) |                      |            |         |                       |
|----------------------------|-----------------------------------------|------------|----------|-------------------------------------------------------------------|----------------------|------------|---------|-----------------------|
|                            | Coefficient<br>± SEM                    | Cohen's f2 | p-value  | p-value<br>adjusted ¥                                             | Coefficient<br>± SEM | Cohen's f2 | p-value | p-value<br>adjusted ¥ |
| Dystonia at onset          |                                         |            |          |                                                                   |                      |            |         |                       |
| Akinesia at onset          |                                         |            |          |                                                                   |                      |            |         |                       |
| Tremor at onset            |                                         |            |          |                                                                   |                      |            |         |                       |
| Micrographia at onset      |                                         |            |          |                                                                   |                      |            |         |                       |
| Bradykinesia               | 0.00 ± 0.00                             | <0.001     | 0.8056   | 0.8056                                                            | 0.11 ± 0.88          | <0.001     | 0.8997  | 0.9838                |
| Rigidity                   | 0.00 ± 0.00                             | 0.001      | 0.2721   | 0.4276                                                            | -0.60 ± 0.74         | <0.001     | 0.4174  | 0.6151                |
| Tremor                     | 0.00 ± 0.00                             | <0.001     | 0.7035   | 0.8056                                                            | -0.04 ± 0.43         | <0.001     | 0.9355  | 0.9838                |
| Asymmetry                  | 0.00 ± 0.00                             | -0.002     | 0.2099   | 0.3848                                                            | 1.29 ± 0.73          | 0.002      | 0.0754  | 0.2764                |
| Dyskinesia                 | 0.00 ± 0.00                             | 0.007      | 0.0036*  | 0.0098*                                                           | 0.01 ± 0.50          | <0.001     | 0.9838  | 0.9838                |
| Motor fluctuations         | 0.00 ± 0.00                             | 0.032      | <0.0001* | <0.0001*                                                          | -0.38 ± 0.49         | <0.001     | 0.4474  | 0.6151                |
| Dysautonomia               | 0.00 ± 0.00                             | 0.014      | 0.0020*  | 0.0072*                                                           | -1.39 ± 0.50         | 0.008      | 0.0070* | 0.0386*               |
| Dementia                   | 0.00 ± 0.00                             | <0.001     | 0.7806   | 0.8056                                                            | -3.19 ± 1.20         | 0.006      | 0.0017* | 0.0190*               |
| Levodopa<br>responsiveness | 0.00 ± 0.00                             | 0.002      | 0.5097   | 0.7008                                                            | 0.95 ± 0.99          | 0.003      | 0.3359  | 0.6151                |
| Hoehn&Yahr ON‡             | 0.00 ± 0.00                             | 0.035      | <0.0001* | <0.0001*                                                          | -0.28 ± 0.25         | 0.002      | 0.2780  | 0.6151                |
| UPDRS-Part III ON‡         | 0.01 ± 0.00                             | 0.005      | 0.0451*  | 0.0993                                                            | -2.20 ± 2.77         | 0.001      | 0.4285  | 0.6151                |

Coefficients and standard error (SE) were extracted from complete GLMs with all interactions. Complete GLMs included sex, mutation status, age-at-onset, disease duration, L-DOPA group, mutation status:sex, mutation status:age-at-onset, mutation status:disease duration, mutation status:L-DOPA group and age-at-onset:disease for all 15 variables except for onset variables for which effects involving disease duration and L-DOPA group were not included

‡ Linear models were used to compare clinical features between *PRKN*-PD and PD-NM; generalised linear models (GLM) with logit links and Bernoulli distributions were used otherwise

\* p<0.05

¥ p corrected for multiple testing by the Benjamini-Hochberg procedure

**Supplementary TABLE 2. Comparison of the demographic and clinical characteristics of patients with Parkinson’s disease carrying *PINK1* (*PINK1*-PD) and *PRKN* mutations (*PRKN*-PD)**

| <b>Characteristics</b>             | <b><i>PINK1</i>-PD<br/>(n = 33)</b> | <b><i>PRKN</i>-PD<br/>(n = 241)</b> | <b>p value</b> |
|------------------------------------|-------------------------------------|-------------------------------------|----------------|
| <b>Demographic characteristics</b> |                                     |                                     |                |
| Sex (% male)                       | 17/33 (51.5%)                       | 125/241 (51.9%)                     | 1              |
| Age at onset (SD), year            | 34.6 (12.2)                         | 31.3 (10.9)                         | 0.20           |
| Age at examination (SD) year       | 51.9 (15.1)                         | 45.3 (13.0)                         | 0.04*          |
| Disease duration (SD), year        | 17.3 (12.5)                         | 14.2 (10.4)                         | 0.20           |
| <b>Clinical characteristics</b>    |                                     |                                     |                |
| Dystonia at onset                  | 18/20 (90%)                         | 38/209 (18.2%)                      | <0.0001*       |
| Akinesia at onset                  | 11/17 (42.1%)                       | 102/214 (47.7%)                     | 0.21           |
| Tremor at onset                    | 2/12 (16.7%)                        | 146/213 (68.5%)                     | 0.0005*        |
| Micrographia at onset              | 3/17 (17.7%)                        | 43/211 (20.4%)                      | 1              |
| Bradykinesia                       | 32/32 (100%)                        | 209/218 (95.9%)                     | 0.30           |
| Rigidity                           | 31/31 (100%)                        | 203/214 (94.9%)                     | 0.37           |
| Tremor                             | 27/31 (87.1%)                       | 176/215 (81.9%)                     | 0.62           |
| Asymmetry                          | 14/17 (82.4%)                       | 188/206 (91.3%)                     | 0.21           |
| Dyskinesia                         | 14/15 (93.3%)                       | 100/185 (54.1%)                     | 0.0024*        |
| Motor fluctuations                 | 11/15 (66.7%)                       | 85/184 (46.2%)                      | 0.059          |
| Dysautonomia                       | 13/18 (72.2%)                       | 39/199 (19.6%)                      | <0.0001*       |
| Dementia                           | 7/28 (25%)                          | 6/159 (3.8%)                        | 0.0007*        |

Demographic and clinical characteristics are expressed as the mean and standard deviation for continuous variables and as counts and percentages for categorical variables, independently for each group. These characteristics were compared between groups using Welch’s *t*-tests for continuous variables and Fisher’s exact tests for categorical variables.

\*  $p < 0.05$

**Supplementary TABLE 3. The French clinicians' network for Parkinson's disease genetics (the PDG group) members**

| <b>Clinicians</b>      | <b>Site investigators</b>                                                                              | <b>E-mail</b>                          |
|------------------------|--------------------------------------------------------------------------------------------------------|----------------------------------------|
| Agid Yves              | Department for the Central Nervous System, Paris                                                       | yves.agid@icm-institute.org            |
| Anheim Mathieu         | Department of Neurology, Strasbourg                                                                    | mathieu.anheim@chru-strasbourg.fr      |
| Borg Michel            | Department of Neurology, Nice                                                                          | borg.m@chu-nice.fr                     |
| Brice Alexis           | Department of Genetics and Cytogenetics, Paris                                                         | alexis.brice@icm-institute.org         |
| Broussolle Emmanuel    | Pôle des Spécialités Neurologiques, Lyon                                                               | emmanuel.broussolle@sfr.fr             |
| Corvol Jean-Christophe | Center for Clinical Investigations, Paris                                                              | jean-christophe.corvol@aphp.fr         |
| Damier Philippe        | Department of Neurology, Nantes                                                                        | philippe.damier@chu-nantes.fr          |
| Defebvre Luc           | Service de Neurologie et Pathologie du Mouvement, Clinique Neurologique, Hôpital Roger Salengro, Lille | Luc.DEFEBVRE@CHRU-LILLE.FR             |
| Dürr Alexandra         | Department of Genetics and Cytogenetics, Paris                                                         | alexandra.durr@upmc.fr                 |
| Durif Franck           | Department of Neurology A, Clermont-Ferrand                                                            | franck.durif@uca.fr                    |
| Houetto Jean-Luc       | Service de neurologie, CHU de Poitiers, Poitiers                                                       | Jean-Luc.HOUETO@chu-poitiers.fr        |
| Krack Paul             | Pôle Psychiatrie et Neurologie, Grenoble                                                               | paul.krack@insel.ch                    |
| Klebe Stephan          | Centre for Clinical Investigations, Paris                                                              | klebe_s@klinik.uni-wuerzburg.de        |
| Lesage Suzanne         | ICM INSERM U1127, Paris                                                                                | suzanne.lesage@upmc.fr                 |
| Lohmann Ebba           | Department of Genetics and Cytogenetics, Paris                                                         | ebbalohmann@gmx.net                    |
| Martinez Maria         | INSERM Unit 563, Toulouse                                                                              | Maria.Martinez@inserm.fr               |
| Mangone Graziella      | Centre for Clinical Investigations, Paris                                                              | graziella.mangone@icm-institute.org    |
| Pollak Pierre          | Pôle Psychiatrie et Neurologie, Grenoble                                                               | Pierre.Pollak@hcuge.ch                 |
| Rascol Olivier         | Clinical Investigation Centre, Toulouse                                                                | olivier.rascol@univ-tlse3.fr           |
| Tison François         | Pôle des Neurosciences, Cliniques de Neurologie, Bordeaux                                              | francois.tison@chu-bordeaux.fr         |
| Tranchant Christine    | Department of Neurology, Strasbourg                                                                    | Christine.Tranchant@chru-strasbourg.fr |



|                  |                                                     |                             |
|------------------|-----------------------------------------------------|-----------------------------|
| Vérin Marc       | Department of Neurology,<br>Rennes                  | marc.verin@chu-rennes.fr    |
| Viallet François | Department of Neurology,<br>Aix-en-Provence         | fvialet@ch-aix.fr           |
| Vidailhet Marie  | Department for the Central<br>Nervous System, Paris | marie.vidailhet@psl.aphp.fr |
